CORRECTION

# Correction: Doctors' perceptions of the impact of upfront point-of-care testing in the emergency department

The *PLOS ONE* Staff

Several institution names were omitted during peer review and were not replaced before publication. The second paragraph under sub-heading "Study design and setting" in the Materials and methods section should read: Permission to conduct the study was granted by the Research Ethics Committee of the Faculty of Health Sciences of the University of Johannesburg (REC-01-185-2016 and REC-01-51-2017); the Human Research Ethics Committee of the University of the Witwatersrand (M171086) as well as the South African National Health Research Ethics Committee (DOH-27-0117-5628). Written informed consent was obtained from all doctors who participated in the survey. The randomized controlled trial was registered with [clinicaltrials.gov](http://clinicaltrials.gov) (NCT03102216).

Reference 6 was omitted from the article. Reference 6 should read: Goldstein LN, Wells M, Vincent-Lambert C. A randomized controlled trial to assess the impact of upfront point-of-care testing on emergency department treatment time. *Am J Clin Path.* 2018; 150(3):224–234. doi: [10.1093/ajcp/aqy042](https://doi.org/10.1093/ajcp/aqy042)

The publisher apologizes for these errors.

## Reference

1. Goldstein LN, Wells M, Vincent-Lambert C (2018) Doctors' perceptions of the impact of upfront point-of-care testing in the emergency department. *PLoS ONE* 13(12): e0208655. <https://doi.org/10.1371/journal.pone.0208655> PMID: [30543668](https://pubmed.ncbi.nlm.nih.gov/30543668/)

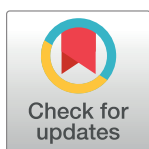

## OPEN ACCESS

**Citation:** The *PLOS ONE* Staff (2019) Correction: Doctors' perceptions of the impact of upfront point-of-care testing in the emergency department. *PLoS ONE* 14(1): e0211672. <https://doi.org/10.1371/journal.pone.0211672>

**Published:** January 29, 2019

**Copyright:** © 2019 The PLOS ONE Staff. This is an open access article distributed under the terms of the [Creative Commons Attribution License](https://creativecommons.org/licenses/by/4.0/), which permits unrestricted use, distribution, and reproduction in any medium, provided the original author and source are credited.
